# Supplementary material for: The Long-Time Chronoamperometric Current at an Inlaid Microband (or Laminar) Electrode
Source: Sensors (Basel). 2013 Jan 4;13(1):626–47. doi: 10.3390/s130100626 (PMC3574695; doi:10.3390/s130100626)
Supplement: Supplementary File 1 — Q_beta_working_curve.csv (CSV, 53 KB) [file sensors-13-00626-s001.csv]

0.0100000000	157.8862631047
0.0100577306	156.9846363490
0.0101157945	156.0881848495
0.0101741937	155.1968789005
0.0102329299	154.3106889668
0.0102920053	153.4295856829
0.0103514217	152.5535398516
0.0104111811	151.6825224435
0.0104712855	150.8165045957
0.0105317369	149.9554576109
0.0105925373	149.0993529568
0.0106536886	148.2481622646
0.0107151931	147.4018573285
0.0107770525	146.5604101044
0.0108392691	145.7237927095
0.0109018449	144.8919774206
0.0109647820	144.0649366741
0.0110280823	143.2426430643
0.0110917482	142.4250693429
0.0111557815	141.6121884179
0.0112201845	140.8039733531
0.0112849594	140.0003973666
0.0113501082	139.2014338303
0.0114156330	138.4070562691
0.0114815362	137.6172383596
0.0115478198	136.8319539298
0.0116144861	136.0511769576
0.0116815373	135.2748815706
0.0117489755	134.5030420446
0.0118168031	133.7356328033
0.0118850223	132.9726284170
0.0119536353	132.2140036021
0.0120226443	131.4597332201
0.0120920518	130.7097922767
0.0121618600	129.9641559212
0.0122320712	129.2227994456
0.0123026877	128.4856982834
0.0123737119	127.7528280094
0.0124451461	127.0241643385
0.0125169927	126.2996831250
0.0125892541	125.5793603619
0.0126619327	124.8631721798
0.0127350308	124.1510948464
0.0128085509	123.4431047656
0.0128824955	122.7391784769
0.0129568670	122.0392926542
0.0130316678	121.3434241055
0.0131069004	120.6515497718
0.0131825674	119.9636467264
0.0132586712	119.2796921745
0.0133352143	118.5996634517
0.0134121994	117.9235380241
0.0134896288	117.2512934868
0.0135675053	116.5829075639
0.0136458314	115.9183581069
0.0137246096	115.2576230947
0.0138038426	114.6006806326
0.0138835331	113.9475089516
0.0139636836	113.2980864075
0.0140442968	112.6523914803
0.0141253754	112.0104027739
0.0142069221	111.3720990145
0.0142889396	110.7374590508
0.0143714305	110.1064618528
0.0144543977	109.4790865110
0.0145378439	108.8553122363
0.0146217717	108.2351183586
0.0147061842	107.6184843265
0.0147910839	107.0053897068
0.0148764737	106.3958141833
0.0149623566	105.7897375565
0.0150487352	105.1871397430
0.0151356125	104.5880007745
0.0152229913	103.9923007972
0.0153108746	103.4000200716
0.0153992653	102.8111389713
0.0154881662	102.2256379825
0.0155775803	101.6434977035
0.0156675107	101.0646988440
0.0157579602	100.4892222244
0.0158489319	99.9170487750
0.0159404288	99.3481595358
0.0160324539	98.7825356557
0.0161250103	98.2201583914
0.0162181010	97.6610091075
0.0163117291	97.1050692756
0.0164058977	96.5523204735
0.0165006100	96.0027443847
0.0165958691	95.4563227980
0.0166916781	94.9130376067
0.0167880402	94.3728708079
0.0168849586	93.8358045022
0.0169824365	93.3018208928
0.0170804772	92.7709022851
0.0171790839	92.2430310861
0.0172782598	91.7181898038
0.0173780083	91.1963610465
0.0174783326	90.6775275224
0.0175792361	90.1616720390
0.0176807222	89.6487775023
0.0177827941	89.1388269166
0.0178854553	88.6318033838
0.0179887092	88.1276901025
0.0180925591	87.6264703680
0.0181970086	87.1281275714
0.0183020611	86.6326451992
0.0184077200	86.1400068326
0.0185139889	85.6501961470
0.0186208714	85.1631969116
0.0187283708	84.6789929888
0.0188364909	84.1975683335
0.0189452351	83.7189069927
0.0190546072	83.2429931051
0.0191646106	82.7698109004
0.0192752491	82.2993446987
0.0193865264	81.8315789102
0.0194984460	81.3664980346
0.0196110118	80.9040866605
0.0197242274	80.4443294650
0.0198380966	79.9872112132
0.0199526231	79.5327167576
0.0200678109	79.0808310376
0.0201836636	78.6315390791
0.0203001852	78.1848259939
0.0204173794	77.7406769793
0.0205352503	77.2990773176
0.0206538016	76.8600123755
0.0207730373	76.4234676037
0.0208929613	75.9894285366
0.0210135777	75.5578807912
0.0211348904	75.1288100676
0.0212569035	74.7022021475
0.0213796209	74.2780428945
0.0215030468	73.8563182533
0.0216271852	73.4370142491
0.0217520403	73.0201169876
0.0218776162	72.6056126540
0.0220039171	72.1934875129
0.0221309471	71.7837279077
0.0222587104	71.3763202604
0.0223872114	70.9712510705
0.0225164542	70.5685069154
0.0226464431	70.1680744493
0.0227771824	69.7699404032
0.0229086765	69.3740915841
0.0230409298	68.9805148748
0.0231739465	68.5891972333
0.0233077312	68.2001256926
0.0234422882	67.8132873600
0.0235776220	67.4286694169
0.0237137371	67.0462591182
0.0238506380	66.6660437921
0.0239883292	66.2880108392
0.0241268153	65.9121477329
0.0242661010	65.5384420181
0.0244061907	65.1668813113
0.0245470892	64.7974533003
0.0246888010	64.4301457432
0.0248313311	64.0649464686
0.0249746839	63.7018433749
0.0251188643	63.3408244300
0.0252638771	62.9818776709
0.0254097271	62.6249912031
0.0255564190	62.2701532004
0.0257039578	61.9173519048
0.0258523484	61.5665756254
0.0260015956	61.2178127385
0.0261517045	60.8710516872
0.0263026799	60.5262809809
0.0264545269	60.1834891950
0.0266072506	59.8426649704
0.0267608559	59.5037970132
0.0269153480	59.1668740944
0.0270707320	58.8318850494
0.0272270131	58.4988187776
0.0273841963	58.1676642423
0.0275422870	57.8384104701
0.0277012904	57.5110465503
0.0278612117	57.1855616353
0.0280220562	56.8619449395
0.0281838293	56.5401857391
0.0283465363	56.2202733721
0.0285101827	55.9021972376
0.0286747738	55.5859467954
0.0288403150	55.2715115660
0.0290068120	54.9588811300
0.0291742701	54.6480451278
0.0293426950	54.3389932592
0.0295120923	54.0317152832
0.0296824674	53.7262010176
0.0298538262	53.4224403384
0.0300261742	53.1204231801
0.0301995172	52.8201395347
0.0303738609	52.5215794517
0.0305492111	52.2247330378
0.0307255737	51.9295904563
0.0309029543	51.6361419272
0.0310813590	51.3443777265
0.0312607937	51.0542881860
0.0314412642	50.7658636930
0.0316227766	50.4790946900
0.0318053369	50.1939716744
0.0319889511	49.9104851981
0.0321736253	49.6286258672
0.0323593657	49.3483843418
0.0325461783	49.0697513354
0.0327340695	48.7927176151
0.0329230453	48.5172740008
0.0331131121	48.2434113652
0.0333042762	47.9711206333
0.0334965439	47.7003927821
0.0336899216	47.4312188407
0.0338844156	47.1635898895
0.0340800325	46.8974970599
0.0342767787	46.6329315346
0.0344746607	46.3698845466
0.0346736850	46.1083473794
0.0348738584	45.8483113664
0.0350751874	45.5897678909
0.0352776787	45.3327083854
0.0354813389	45.0771243319
0.0356861749	44.8230072611
0.0358921935	44.5703487522
0.0360994014	44.3191404331
0.0363078055	44.0693739794
0.0365174127	43.8210411146
0.0367282300	43.5741336097
0.0369402644	43.3286432830
0.0371535229	43.0845619997
0.0373680125	42.8418816717
0.0375837404	42.6005942573
0.0378007137	42.3606917610
0.0380189396	42.1221662331
0.0382384254	41.8850097697
0.0384591782	41.6492145122
0.0386812055	41.4147726469
0.0389045145	41.1816764052
0.0391291127	40.9499180631
0.0393550075	40.7194899407
0.0395822065	40.4903844025
0.0398107171	40.2625938564
0.0400405468	40.0361107544
0.0402717034	39.8109275913
0.0405041945	39.5870369054
0.0407380278	39.3644312776
0.0409732110	39.1431033314
0.0412097519	38.9230457327
0.0414476584	38.7042511896
0.0416869383	38.4867124517
0.0419275997	38.2704223106
0.0421696503	38.0553735990
0.0424130984	37.8415591909
0.0426579519	37.6289720012
0.0429042189	37.4176049854
0.0431519077	37.2074511395
0.0434010264	36.9985034995
0.0436515832	36.7907551416
0.0439035866	36.5841991817
0.0441570447	36.3788287752
0.0444119661	36.1746371167
0.0446683592	35.9716174399
0.0449262325	35.7697630174
0.0451855944	35.5690671604
0.0454464537	35.3695232184
0.0457088190	35.1711245791
0.0459726989	34.9738646684
0.0462381021	34.7777369495
0.0465050376	34.5827349234
0.0467735141	34.3888521283
0.0470435406	34.1960821396
0.0473151259	34.0044185695
0.0475882791	33.8138550669
0.0478630092	33.6243853170
0.0481393254	33.4360030414
0.0484172368	33.2487019978
0.0486967525	33.0624759795
0.0489778819	32.8773188156
0.0492606343	32.6932243707
0.0495450191	32.5101865442
0.0498310456	32.3281992711
0.0501187234	32.1472565207
0.0504080619	31.9673522972
0.0506990708	31.7884806391
0.0509917598	31.6106356192
0.0512861384	31.4338113443
0.0515822165	31.2580019549
0.0518800039	31.0832016254
0.0521795104	30.9094045632
0.0524807460	30.7366050095
0.0527837207	30.5647972381
0.0530884444	30.3939755558
0.0533949274	30.2241343022
0.0537031796	30.0552678493
0.0540132115	29.8873706013
0.0543250331	29.7204369947
0.0546386550	29.5544614978
0.0549540874	29.3894386107
0.0552713408	29.2253628651
0.0555904257	29.0622288241
0.0559113528	28.9000310818
0.0562341325	28.7387642636
0.0565587757	28.5784230255
0.0568852931	28.4190020545
0.0572136955	28.2604960677
0.0575439937	28.1028998128
0.0578761988	27.9462080676
0.0582103218	27.7904156397
0.0585463736	27.6355173668
0.0588843655	27.4815081160
0.0592243087	27.3283827839
0.0595662144	27.1761362964
0.0599100939	27.0247636085
0.0602559586	26.8742597043
0.0606038201	26.7246195965
0.0609536897	26.5758383266
0.0613055792	26.4279109644
0.0616595002	26.2808326080
0.0620154644	26.1345983838
0.0623734835	25.9892034460
0.0627335696	25.8446429767
0.0630957344	25.7009121856
0.0634599901	25.5580063100
0.0638263486	25.4159206144
0.0641948222	25.2746503905
0.0645654229	25.1341909571
0.0649381632	24.9945376599
0.0653130553	24.8556858712
0.0656901116	24.7176309898
0.0660693448	24.5803684411
0.0664507673	24.4438936766
0.0668343918	24.3082021741
0.0672202309	24.1732894371
0.0676082975	24.0391509950
0.0679986045	23.9057824030
0.0683911647	23.7731792417
0.0687859912	23.6413371170
0.0691830971	23.5102516600
0.0695824955	23.3799185272
0.0699841996	23.2503333995
0.0703882228	23.1214919831
0.0707945784	22.9933900085
0.0712032800	22.8660232309
0.0716143410	22.7393874296
0.0720277751	22.6134784086
0.0724435960	22.4882919954
0.0728618175	22.3638240419
0.0732824533	22.2400704236
0.0737055175	22.1170270398
0.0741310241	21.9946898131
0.0745589872	21.8730546897
0.0749894209	21.7521176390
0.0754223396	21.6318746536
0.0758577575	21.5123217491
0.0762956891	21.3934549638
0.0767361489	21.2752703589
0.0771791516	21.1577640181
0.0776247117	21.0409320477
0.0780728440	20.9247705763
0.0785235635	20.8092757546
0.0789768849	20.6944437556
0.0794328235	20.5802707741
0.0798913942	20.4667530268
0.0803526122	20.3538867521
0.0808164929	20.2416682100
0.0812830516	20.1300936819
0.0817523038	20.0191594707
0.0822242650	19.9088619004
0.0826989509	19.7991973160
0.0831763771	19.6901620837
0.0836565596	19.5817525905
0.0841395142	19.4739652439
0.0846252569	19.3667964723
0.0851138038	19.2602427245
0.0856051712	19.1543004697
0.0860993752	19.0489661973
0.0865964323	18.9442364169
0.0870963590	18.8401076581
0.0875991718	18.7365764704
0.0881048873	18.6336394233
0.0886135224	18.5312931056
0.0891250938	18.4295341260
0.0896396186	18.3283591126
0.0901571138	18.2277647128
0.0906775965	18.1277475932
0.0912010839	18.0283044397
0.0917275935	17.9294319570
0.0922571427	17.8311268688
0.0927897490	17.7333859177
0.0933254301	17.6362058649
0.0938642037	17.5395834901
0.0944060876	17.4435155917
0.0949510999	17.3479989864
0.0954992586	17.2530305089
0.0960505818	17.1586070125
0.0966050879	17.0647253682
0.0971627952	16.9713824652
0.0977237221	16.8785752105
0.0982878873	16.7863005286
0.0988553095	16.6945553621
0.0994260074	16.6033366707
0.1000000000	16.5126414319
0.1005773063	16.4224666403
0.1011579454	16.3328093078
0.1017419366	16.2436664636
0.1023292992	16.1550351538
0.1029200527	16.0669124415
0.1035142167	15.9792954066
0.1041118108	15.8921811459
0.1047128548	15.8055667726
0.1053173687	15.7194494167
0.1059253725	15.6338262246
0.1065368864	15.5486943591
0.1071519305	15.4640509992
0.1077705254	15.3798933402
0.1083926914	15.2962185934
0.1090184492	15.2130239862
0.1096478196	15.1303067618
0.1102808234	15.0480641793
0.1109174815	14.9662935134
0.1115578151	14.8849920546
0.1122018454	14.8041571090
0.1128495938	14.7237859979
0.1135010816	14.6438760582
0.1141563305	14.5644246419
0.1148153621	14.4854291165
0.1154781985	14.4068868642
0.1161448614	14.3287952825
0.1168153730	14.2511517837
0.1174897555	14.1739537951
0.1181680313	14.0971987587
0.1188502227	14.0208841310
0.1195363526	13.9450073834
0.1202264435	13.8695660015
0.1209205183	13.7945574857
0.1216186001	13.7199793503
0.1223207119	13.6458291242
0.1230268771	13.5721043504
0.1237371190	13.4988025859
0.1244514612	13.4259214019
0.1251699273	13.3534583833
0.1258925412	13.2814111290
0.1266193268	13.2097772518
0.1273503081	13.1385543779
0.1280855095	13.0677401473
0.1288249552	12.9973322136
0.1295686698	12.9273282437
0.1303166778	12.8577259181
0.1310690042	12.7885229304
0.1318256739	12.7197169875
0.1325867118	12.6513058095
0.1333521432	12.5832871296
0.1341219935	12.5156586940
0.1348962883	12.4484182617
0.1356750530	12.3815636046
0.1364583137	12.3150925076
0.1372460961	12.2490027681
0.1380384265	12.1832921962
0.1388353310	12.1179586145
0.1396368361	12.0529998583
0.1404429684	11.9884137749
0.1412537545	11.9241982245
0.1420692213	11.8603510791
0.1428893959	11.7968702233
0.1437143053	11.7337535535
0.1445439771	11.6709989784
0.1453784386	11.6086044185
0.1462177174	11.5465678065
0.1470618415	11.4848870868
0.1479108388	11.4235602155
0.1487647374	11.3625851606
0.1496235656	11.3019599017
0.1504873519	11.2416824300
0.1513561248	11.1817507481
0.1522299133	11.1221628703
0.1531087462	11.0629168222
0.1539926526	11.0040106405
0.1548816619	10.9454423736
0.1557758035	10.8872100806
0.1566751070	10.8293118322
0.1575796023	10.7717457099
0.1584893192	10.7145098062
0.1594042881	10.6576022247
0.1603245391	10.6010210797
0.1612501027	10.5447644966
0.1621810097	10.4888306111
0.1631172909	10.4332175701
0.1640589773	10.3779235308
0.1650061001	10.3229466610
0.1659586907	10.2682851392
0.1669167807	10.2139371542
0.1678804018	10.1599009052
0.1688495859	10.1061746017
0.1698243652	10.0527564636
0.1708047720	9.9996447210
0.1717908387	9.9468376139
0.1727825981	9.8943333928
0.1737800829	9.8421303180
0.1747833262	9.7902266597
0.1757923614	9.7386206981
0.1768072218	9.6873107235
0.1778279410	9.6362950356
0.1788545529	9.5855719443
0.1798870915	9.5351397687
0.1809255910	9.4849968380
0.1819700859	9.4351414906
0.1830206106	9.3855720748
0.1840772001	9.3362869482
0.1851398894	9.2872844777
0.1862087137	9.2385630397
0.1872837083	9.1901210200
0.1883649089	9.1419568135
0.1894523514	9.0940688244
0.1905460718	9.0464554659
0.1916461063	8.9991151606
0.1927524913	8.9520463400
0.1938652636	8.9052474444
0.1949844600	8.8587169233
0.1961101175	8.8124532350
0.1972422736	8.7664548468
0.1983809657	8.7207202345
0.1995262315	8.6752478828
0.2006781090	8.6300362852
0.2018366364	8.5850839437
0.2030018520	8.5403893688
0.2041737945	8.4959510799
0.2053525026	8.4517676044
0.2065380156	8.4078374787
0.2077303726	8.3641592471
0.2089296131	8.3207314625
0.2101357769	8.2775526861
0.2113489040	8.2346214873
0.2125690345	8.1919364437
0.2137962090	8.1494961411
0.2150304679	8.1072991734
0.2162718524	8.0653441425
0.2175204034	8.0236296585
0.2187761624	7.9821543392
0.2200391710	7.9409168106
0.2213094710	7.8999157064
0.2225871045	7.8591496682
0.2238721139	7.8186173454
0.2251645417	7.7783173951
0.2264644308	7.7382484822
0.2277718242	7.6984092792
0.2290867653	7.6587984661
0.2304092976	7.6194147307
0.2317394650	7.5802567682
0.2330773115	7.5413232813
0.2344228815	7.5026129801
0.2357762196	7.4641245821
0.2371373706	7.4258568122
0.2385063795	7.3878084027
0.2398832919	7.3499780929
0.2412681533	7.3123646297
0.2426610095	7.2749667669
0.2440619068	7.2377832656
0.2454708916	7.2008128938
0.2468880105	7.1640544269
0.2483133105	7.1275066470
0.2497468389	7.0911683434
0.2511886432	7.0550383122
0.2526387710	7.0191153566
0.2540972706	6.9833982863
0.2555641901	6.9478859183
0.2570395783	6.9125770761
0.2585234840	6.8774705899
0.2600159563	6.8425652968
0.2615170448	6.8078600404
0.2630267992	6.7733536711
0.2645452695	6.7390450457
0.2660725060	6.7049330277
0.2676085593	6.6710164871
0.2691534804	6.6372943003
0.2707073204	6.6037653503
0.2722701308	6.5704285263
0.2738419634	6.5372827240
0.2754228703	6.5043268454
0.2770129039	6.4715597989
0.2786121169	6.4389804990
0.2802205622	6.4065878665
0.2818382931	6.3743808284
0.2834653633	6.3423583178
0.2851018268	6.3105192740
0.2867477376	6.2788626422
0.2884031503	6.2473873740
0.2900681199	6.2160924267
0.2917427014	6.1849767637
0.2934269504	6.1540393542
0.2951209227	6.1232791736
0.2968246743	6.0926952030
0.2985382619	6.0622864293
0.3002617421	6.0320518452
0.3019951720	6.0019904494
0.3037386092	5.9721012460
0.3054921113	5.9423832452
0.3072557365	5.9128354625
0.3090295433	5.8834569193
0.3108135903	5.8542466425
0.3126079367	5.8252036646
0.3144126420	5.7963270237
0.3162277660	5.7676157633
0.3180533688	5.7390689326
0.3198895110	5.7106855860
0.3217362533	5.6824647834
0.3235936569	5.6544055902
0.3254617835	5.6265070771
0.3273406949	5.5987683200
0.3292304533	5.5711884003
0.3311311215	5.5437664046
0.3330427623	5.5165014247
0.3349654392	5.4893925576
0.3368992157	5.4624389055
0.3388441561	5.4356395758
0.3408003248	5.4089936809
0.3427677865	5.3825003384
0.3447466066	5.3561586709
0.3467368505	5.3299678061
0.3487385841	5.3039268766
0.3507518740	5.2780350200
0.3527767866	5.2522913790
0.3548133892	5.2266951010
0.3568617493	5.2012453383
0.3589219346	5.1759412483
0.3609940136	5.1507819930
0.3630780548	5.1257667393
0.3651741273	5.1008946587
0.3672823005	5.0761649278
0.3694026444	5.0515767277
0.3715352291	5.0271292441
0.3736801254	5.0028216676
0.3758374043	4.9786531932
0.3780071373	4.9546230208
0.3801893963	4.9307303547
0.3823842537	4.9069744037
0.3845917820	4.8833543813
0.3868120546	4.8598695055
0.3890451450	4.8365189986
0.3912911271	4.8133020876
0.3935500755	4.7902180038
0.3958220648	4.7672659829
0.3981071706	4.7444452650
0.4004054683	4.7217550945
0.4027170343	4.6991947204
0.4050419451	4.6767633956
0.4073802778	4.6544603776
0.4097321098	4.6322849280
0.4120975191	4.6102363128
0.4144765840	4.5883138019
0.4168693835	4.5665166697
0.4192759967	4.5448441946
0.4216965034	4.5232956592
0.4241309839	4.5018703501
0.4265795188	4.4805675582
0.4290421892	4.4593865783
0.4315190768	4.4383267092
0.4340102636	4.4173872540
0.4365158322	4.3965675194
0.4390358656	4.3758668165
0.4415704474	4.3552844599
0.4441196614	4.3348197685
0.4466835922	4.3144720649
0.4492623247	4.2942406758
0.4518559444	4.2741249314
0.4544645372	4.2541241661
0.4570881896	4.2342377179
0.4597269885	4.2144649287
0.4623810214	4.1948051441
0.4650503762	4.1752577136
0.4677351413	4.1558219901
0.4704354057	4.1364973307
0.4731512590	4.1172830957
0.4758827910	4.0981786495
0.4786300923	4.0791833597
0.4813932540	4.0602965979
0.4841723676	4.0415177392
0.4869675252	4.0228461621
0.4897788194	4.0042812489
0.4926063433	3.9858223854
0.4954501908	3.9674689608
0.4983104560	3.9492203679
0.5011872336	3.9310760029
0.5040806191	3.9130352656
0.5069907083	3.8950975592
0.5099175976	3.8772622902
0.5128613840	3.8595288686
0.5158221651	3.8418967078
0.5188000389	3.8243652245
0.5217951042	3.8069338389
0.5248074602	3.7896019742
0.5278372068	3.7723690573
0.5308844442	3.7552345182
0.5339492736	3.7381977900
0.5370317964	3.7212583094
0.5401321148	3.7044155161
0.5432503315	3.6876688531
0.5463865499	3.6710177665
0.5495408739	3.6544617056
0.5527134079	3.6380001230
0.5559042573	3.6216324743
0.5591135276	3.6053582183
0.5623413252	3.5891768168
0.5655877571	3.5730877348
0.5688529308	3.5570904402
0.5721369547	3.5411844043
0.5754399373	3.5253691010
0.5787619883	3.5096440075
0.5821032178	3.4940086040
0.5854637363	3.4784623735
0.5888436554	3.4630048021
0.5922430869	3.4476353788
0.5956621435	3.4323535955
0.5991009386	3.4171589472
0.6025595861	3.4020509316
0.6060382005	3.3870290494
0.6095368972	3.3720928040
0.6130557921	3.3572417018
0.6165950019	3.3424752519
0.6201546437	3.3277929665
0.6237348355	3.3131943603
0.6273356960	3.2986789509
0.6309573445	3.2842462586
0.6345999010	3.2698958066
0.6382634862	3.2556271207
0.6419482215	3.2414397294
0.6456542290	3.2273331641
0.6493816316	3.2133069587
0.6531305526	3.1993606499
0.6569011165	3.1854937768
0.6606934480	3.1717058816
0.6645076729	3.1579965087
0.6683439176	3.1443652053
0.6722023091	3.1308115212
0.6760829754	3.1173350088
0.6799860450	3.1039352230
0.6839116473	3.0906117213
0.6878599123	3.0773640637
0.6918309709	3.0641918127
0.6958249547	3.0510945335
0.6998419960	3.0380717937
0.7038822279	3.0251231631
0.7079457844	3.0122482144
0.7120328000	2.9994465225
0.7161434102	2.9867176649
0.7202777512	2.9740612213
0.7244359601	2.9614767740
0.7286181745	2.9489639077
0.7328245331	2.9365222093
0.7370551753	2.9241512684
0.7413102413	2.9118506765
0.7455898720	2.8996200279
0.7498942093	2.8874589190
0.7542233958	2.8753669485
0.7585775750	2.8633437175
0.7629568912	2.8513888294
0.7673614894	2.8395018896
0.7717915156	2.8276825063
0.7762471166	2.8159302894
0.7807284401	2.8042448513
0.7852356346	2.7926258068
0.7897688494	2.7810727725
0.7943282347	2.7695853676
0.7989139417	2.7581632132
0.8035261222	2.7468059328
0.8081649291	2.7355131518
0.8128305162	2.7242844980
0.8175230379	2.7131196012
0.8222426499	2.7020180935
0.8269895086	2.6909796088
0.8317637711	2.6800037834
0.8365655958	2.6690902556
0.8413951416	2.6582386656
0.8462525688	2.6474486561
0.8511380382	2.6367198713
0.8560517117	2.6260519579
0.8609937522	2.6154445644
0.8659643234	2.6048973414
0.8709635900	2.5944099414
0.8759917176	2.5839820192
0.8810488730	2.5736132311
0.8861352237	2.5633032358
0.8912509381	2.5530516939
0.8963961859	2.5428582676
0.9015711376	2.5327226215
0.9067759646	2.5226444219
0.9120108394	2.5126233371
0.9172759354	2.5026590371
0.9225714272	2.4927511941
0.9278974901	2.4828994820
0.9332543008	2.4731035766
0.9386420367	2.4633631557
0.9440608763	2.4536778987
0.9495109992	2.4440474870
0.9549925860	2.4344716039
0.9605058184	2.4249499344
0.9660508790	2.4154821653
0.9716279516	2.4060679854
0.9772372210	2.3967070850
0.9828788730	2.3873991564
0.9885530947	2.3781438937
0.9942600740	2.3689409925
1.0000000000	2.3597901503
1.0057730630	2.3506910666
1.0115794543	2.3416434421
1.0174193662	2.3326469797
1.0232929923	2.3237013838
1.0292005272	2.3148063605
1.0351421667	2.3059616176
1.0411181076	2.2971668647
1.0471285481	2.2884218128
1.0531736871	2.2797261750
1.0592537252	2.2710796655
1.0653688637	2.2624820007
1.0715193052	2.2539328983
1.0777052537	2.2454320776
1.0839269140	2.2369792597
1.0901844924	2.2285741673
1.0964781961	2.2202165245
1.1028082338	2.2119060573
1.1091748153	2.2036424929
1.1155781514	2.1954255604
1.1220184543	2.1872549903
1.1284959375	2.1791305146
1.1350108157	2.1710518672
1.1415633046	2.1630187830
1.1481536215	2.1550309988
1.1547819847	2.1470882529
1.1614486138	2.1391902849
1.1681537299	2.1313368362
1.1748975549	2.1235276493
1.1816803125	2.1157624686
1.1885022274	2.1080410398
1.1953635257	2.1003631099
1.2022644346	2.0927284276
1.2092051829	2.0851367429
1.2161860006	2.0775878075
1.2232071190	2.0700813742
1.2302687708	2.0626171974
1.2373711899	2.0551950329
1.2445146118	2.0478146379
1.2516992730	2.0404757710
1.2589254118	2.0331781923
1.2661932675	2.0259216630
1.2735030810	2.0187059461
1.2808550945	2.0115308055
1.2882495517	2.0043960069
1.2956866975	1.9973013170
1.3031667785	1.9902465041
1.3106900424	1.9832313378
1.3182567386	1.9762555889
1.3258671178	1.9693190296
1.3335214322	1.9624214335
1.3412199354	1.9555625753
1.3489628826	1.9487422313
1.3567505303	1.9419601789
1.3645831366	1.9352161967
1.3724609610	1.9285100648
1.3803842646	1.9218415645
1.3883533099	1.9152104782
1.3963683611	1.9086165899
1.4044296836	1.9020596845
1.4125375446	1.8955395484
1.4206922129	1.8890559691
1.4288939585	1.8826087353
1.4371430534	1.8761976371
1.4454397707	1.8698224657
1.4537843856	1.8634830135
1.4621771745	1.8571790740
1.4706184154	1.8509104422
1.4791083882	1.8446769140
1.4876473741	1.8384782867
1.4962356561	1.8323143585
1.5048735188	1.8261849291
1.5135612484	1.8200897991
1.5222991329	1.8140287704
1.5310874617	1.8080016460
1.5399265261	1.8020082300
1.5488166189	1.7960483277
1.5577580348	1.7901217456
1.5667510701	1.7842282912
1.5757960227	1.7783677731
1.5848931925	1.7725400011
1.5940428807	1.7667447861
1.6032453907	1.7609819401
1.6125010273	1.7552512761
1.6218100974	1.7495526082
1.6311729092	1.7438857517
1.6405897732	1.7382505230
1.6500610013	1.7326467393
1.6595869074	1.7270742192
1.6691678072	1.7215327820
1.6788040181	1.7160222484
1.6884958595	1.7105424399
1.6982436525	1.7050931791
1.7080477201	1.6996742898
1.7179083872	1.6942855965
1.7278259805	1.6889269250
1.7378008287	1.6835981020
1.7478332624	1.6782989552
1.7579236140	1.6730293133
1.7680722177	1.6677890061
1.7782794100	1.6625778642
1.7885455291	1.6573957194
1.7988709151	1.6522424044
1.8092559103	1.6471177528
1.8197008586	1.6420215992
1.8302061063	1.6369537792
1.8407720015	1.6319141294
1.8513988942	1.6269024873
1.8620871367	1.6219186913
1.8728370830	1.6169625808
1.8836490895	1.6120339961
1.8945235144	1.6071327785
1.9054607180	1.6022587701
1.9164610627	1.5974118142
1.9275249132	1.5925917546
1.9386526360	1.5877984363
1.9498445998	1.5830317052
1.9611011755	1.5782914080
1.9724227361	1.5735773923
1.9838096568	1.5688895066
1.9952623150	1.5642276004
2.0067810900	1.5595915239
2.0183663637	1.5549811283
2.0300185199	1.5503962656
2.0417379447	1.5458367887
2.0535250265	1.5413025513
2.0653801558	1.5367934082
2.0773037256	1.5323092146
2.0892961309	1.5278498270
2.1013577690	1.5234151024
2.1134890398	1.5190048989
2.1256903452	1.5146190753
2.1379620895	1.5102574911
2.1503046793	1.5059200069
2.1627185237	1.5016064840
2.1752040340	1.4973167843
2.1877616239	1.4930507708
2.2003917096	1.4888083073
2.2130947096	1.4845892581
2.2258710448	1.4803934886
2.2387211386	1.4762208649
2.2516454167	1.4720712538
2.2646443076	1.4679445230
2.2777182419	1.4638405408
2.2908676528	1.4597591766
2.3040929761	1.4557003001
2.3173946500	1.4516637822
2.3307731153	1.4476494943
2.3442288153	1.4436573086
2.3577621960	1.4396870982
2.3713737057	1.4357387367
2.3850637955	1.4318120987
2.3988329190	1.4279070592
2.4126815326	1.4240234943
2.4266100951	1.4201612807
2.4406190680	1.4163202956
2.4547089157	1.4125004172
2.4688801049	1.4087015243
2.4831331053	1.4049234965
2.4974683892	1.4011662140
2.5118864315	1.3974295578
2.5263877101	1.3937134094
2.5409727055	1.3900176512
2.5556419011	1.3863421663
2.5703957828	1.3826868384
2.5852348396	1.3790515519
2.6001595632	1.3754361918
2.6151704481	1.3718406439
2.6302679919	1.3682647946
2.6454526947	1.3647085311
2.6607250598	1.3611717411
2.6760855932	1.3576543129
2.6915348039	1.3541561358
2.7070732039	1.3506770994
2.7227013081	1.3472170941
2.7384196343	1.3437760108
2.7542287033	1.3403537414
2.7701290392	1.3369501781
2.7861211686	1.3335652137
2.8022056217	1.3301987420
2.8183829313	1.3268506570
2.8346536335	1.3235208536
2.8510182675	1.3202092273
2.8674773756	1.3169156740
2.8840315031	1.3136400905
2.9006811987	1.3103823740
2.9174270140	1.3071424223
2.9342695040	1.3039201341
2.9512092267	1.3007154083
2.9682467435	1.2975281446
2.9853826189	1.2943582432
3.0026174209	1.2912056052
3.0199517204	1.2880701317
3.0373860919	1.2849517250
3.0549211132	1.2818502875
3.0725573653	1.2787657225
3.0902954325	1.2756979337
3.1081359027	1.2726468254
3.1260793671	1.2696123024
3.1441264203	1.2665942703
3.1622776602	1.2635926349
3.1805336883	1.2606073029
3.1988951097	1.2576381813
3.2173625327	1.2546851778
3.2359365693	1.2517482005
3.2546178350	1.2488271582
3.2734069488	1.2459219603
3.2923045333	1.2430325163
3.3113112148	1.2401587368
3.3304276231	1.2373005326
3.3496543916	1.2344578150
3.3689921574	1.2316304961
3.3884415614	1.2288184881
3.4080032480	1.2260217042
3.4276778655	1.2232400576
3.4474660657	1.2204734625
3.4673685045	1.2177218334
3.4873858414	1.2149850851
3.5075187395	1.2122631332
3.5277678662	1.2095558936
3.5481338923	1.2068632830
3.5686174928	1.2041852182
3.5892193465	1.2015216168
3.6099401359	1.1988723966
3.6307805477	1.1962374761
3.6517412725	1.1936167743
3.6728230050	1.1910102106
3.6940264436	1.1884177048
3.7153522910	1.1858391773
3.7368012538	1.1832745489
3.7583740429	1.1807237409
3.7800713730	1.1781866751
3.8018939632	1.1756632736
3.8238425366	1.1731534592
3.8459178205	1.1706571551
3.8681205463	1.1681742846
3.8904514499	1.1657047721
3.9129112713	1.1632485418
3.9355007546	1.1608055188
3.9582206484	1.1583756284
3.9810717055	1.1559587964
4.0040546833	1.1535549492
4.0271703433	1.1511640133
4.0504194514	1.1487859160
4.0738027780	1.1464205848
4.0973210981	1.1440679476
4.1209751910	1.1417279329
4.1447658404	1.1394004695
4.1686938347	1.1370854867
4.1927599668	1.1347829140
4.2169650343	1.1324926818
4.2413098391	1.1302147203
4.2657951880	1.1279489605
4.2904218924	1.1256953338
4.3151907683	1.1234537719
4.3401026364	1.1212242068
4.3651583224	1.1190065712
4.3903586564	1.1168007979
4.4157044735	1.1146068203
4.4411966137	1.1124245720
4.4668359215	1.1102539873
4.4926232467	1.1080950005
4.5185594437	1.1059475466
4.5446453721	1.1038115608
4.5708818961	1.1016869788
4.5972698853	1.0995737365
4.6238102140	1.0974717705
4.6505037617	1.0953810175
4.6773514129	1.0933014146
4.7043540573	1.0912328994
4.7315125896	1.0891754098
4.7588279099	1.0871288839
4.7863009232	1.0850932605
4.8139325400	1.0830684786
4.8417236758	1.0810544773
4.8696752517	1.0790511966
4.8977881937	1.0770585764
4.9260634335	1.0750765571
4.9545019080	1.0731050795
4.9831045597	1.0711440848
5.0118723363	1.0691935143
5.0408061910	1.0672533098
5.0699070827	1.0653234136
5.0991759757	1.0634037681
5.1286138399	1.0614943161
5.1582216507	1.0595950008
5.1880003893	1.0577057657
5.2179510424	1.0558265546
5.2480746025	1.0539573117
5.2783720678	1.0520979815
5.3088444423	1.0502485087
5.3394927357	1.0484088385
5.3703179637	1.0465789164
5.4013211476	1.0447586882
5.4325033149	1.0429480999
5.4638654988	1.0411470981
5.4954087386	1.0393556293
5.5271340794	1.0375736407
5.5590425727	1.0358010796
5.5911352757	1.0340378937
5.6234132519	1.0322840309
5.6558775709	1.0305394396
5.6885293084	1.0288040684
5.7213695465	1.0270778660
5.7543993734	1.0253607817
5.7876198835	1.0236527650
5.8210321777	1.0219537657
5.8546373632	1.0202637338
5.8884365536	1.0185826197
5.9224308688	1.0169103741
5.9566214353	1.0152469479
5.9910093861	1.0135922923
6.0255958607	1.0119463589
6.0603820053	1.0103090995
6.0953689724	1.0086804661
6.1305579215	1.0070604112
6.1659500186	1.0054488873
6.2015464365	1.0038458475
6.2373483548	1.0022512448
6.2733569598	1.0006650328
6.3095734448	0.9990871653
6.3459990098	0.9975175962
6.3826348619	0.9959562798
6.4194822151	0.9944031707
6.4565422903	0.9928582237
6.4938163158	0.9913213939
6.5313055265	0.9897926366
6.5690111648	0.9882719074
6.6069344801	0.9867591622
6.6450767291	0.9852543572
6.6834391757	0.9837574487
6.7220230911	0.9822683932
6.7608297539	0.9807871479
6.7998604500	0.9793136696
6.8391164728	0.9778479159
6.8785991231	0.9763898444
6.9183097092	0.9749394130
6.9582495470	0.9734965797
6.9984199600	0.9720613031
7.0388222794	0.9706335416
7.0794578438	0.9692132541
7.1203280000	0.9678003998
7.1614341021	0.9663949379
7.2027775124	0.9649968281
7.2443596007	0.9636060301
7.2861817451	0.9622225039
7.3282453314	0.9608462100
7.3705517534	0.9594771086
7.4131024130	0.9581151607
7.4558987203	0.9567603271
7.4989420933	0.9554125690
7.5422339585	0.9540718478
7.5857757503	0.9527381252
7.6295689116	0.9514113630
7.6736148936	0.9500915234
7.7179151559	0.9487785685
7.7624711663	0.9474724609
7.8072844014	0.9461731634
7.8523563461	0.9448806389
7.8976884940	0.9435948505
7.9432823472	0.9423157617
7.9891394167	0.9410433360
8.0352612219	0.9397775372
8.0816492911	0.9385183294
8.1283051616	0.9372656766
8.1752303794	0.9360195435
8.2224264995	0.9347798945
8.2698950857	0.9335466946
8.3176377110	0.9323199087
8.3656559576	0.9310995022
8.4139514165	0.9298854403
8.4625256881	0.9286776889
8.5113803820	0.9274762136
8.5605171172	0.9262809806
8.6099375218	0.9250919560
8.6596432336	0.9239091063
8.7096358996	0.9227323981
8.7599171763	0.9215617982
8.8104887301	0.9203972737
8.8613522366	0.9192387916
8.9125093813	0.9180863193
8.9639618595	0.9169398245
9.0157113761	0.9157992749
9.0677596458	0.9146646384
9.1201083936	0.9135358831
9.1727593539	0.9124129773
9.2257142715	0.9112958895
9.2789749013	0.9101845884
9.3325430080	0.9090790428
9.3864203667	0.9079792218
9.4406087629	0.9068850945
9.4951099920	0.9057966303
9.5499258602	0.9047137987
9.6050581839	0.9036365695
9.6605087899	0.9025649126
9.7162795158	0.9014987981
9.7723722096	0.9004381961
9.8287887300	0.8993830772
9.8855309466	0.8983334118
9.9426007395	0.8972891707
10.0000000000	0.8962503249
10.0577306300	0.8952168454
10.1157945426	0.8941887035
10.1741936618	0.8931658705
10.2329299228	0.8921483180
10.2920052719	0.8911360178
10.3514216668	0.8901289418
10.4111810762	0.8891270620
10.4712854805	0.8881303506
10.5317368713	0.8871387800
10.5925372518	0.8861523227
10.6536886367	0.8851709514
10.7151930524	0.8841946390
10.7770525369	0.8832233584
10.8392691402	0.8822570828
10.9018449239	0.8812957854
10.9647819614	0.8803394397
11.0280823385	0.8793880194
11.0917481526	0.8784414982
11.1557815135	0.8774998499
11.2201845430	0.8765630486
11.2849593753	0.8756310685
11.3501081567	0.8747038839
11.4156330462	0.8737814694
11.4815362150	0.8728637995
11.5478198469	0.8719508490
11.6144861384	0.8710425928
11.6815372986	0.8701390060
11.7489755494	0.8692400637
11.8168031254	0.8683457414
11.8850222744	0.8674560144
11.9536352567	0.8665708584
12.0226443462	0.8656902492
12.0920518294	0.8648141625
12.1618600065	0.8639425745
12.2320711905	0.8630754612
12.3026877081	0.8622127991
12.3737118994	0.8613545644
12.4451461177	0.8605007337
12.5169927303	0.8596512838
12.5892541179	0.8588061915
12.6619326751	0.8579654336
12.7350308102	0.8571289873
12.8085509454	0.8562968298
12.8824955169	0.8554689384
12.9568669752	0.8546452905
13.0316677845	0.8538258638
13.1069004237	0.8530106359
13.1825673856	0.8521995847
13.2586711776	0.8513926882
13.3352143216	0.8505899244
13.4121993541	0.8497912715
13.4896288259	0.8489967078
13.5675053030	0.8482062119
13.6458313659	0.8474197622
13.7246096101	0.8466373375
13.8038426460	0.8458589165
13.8835330993	0.8450844782
13.9636836106	0.8443140016
14.0442968358	0.8435474658
14.1253754462	0.8427848502
14.2069221286	0.8420261342
14.2889395851	0.8412712971
14.3714305336	0.8405203187
14.4543977075	0.8397731786
14.5378438561	0.8390298568
14.6217717446	0.8382903331
14.7061841540	0.8375545877
14.7910838817	0.8368226006
14.8764737408	0.8360943522
14.9623565609	0.8353698229
15.0487351880	0.8346489932
15.1356124844	0.8339318437
15.2229913288	0.8332183550
15.3108746168	0.8325085081
15.3992652606	0.8318022838
15.4881661891	0.8310996632
15.5775803483	0.8304006275
15.6675107011	0.8297051577
15.7579602274	0.8290132355
15.8489319246	0.8283248420
15.9404288071	0.8276399590
16.0324539069	0.8269585680
16.1250102734	0.8262806509
16.2181009736	0.8256061894
16.3117290923	0.8249351656
16.4058977320	0.8242675614
16.5006100132	0.8236033591
16.5958690744	0.8229425408
16.6916780721	0.8222850890
16.7880401812	0.8216309860
16.8849585949	0.8209802144
16.9824365246	0.8203327569
17.0804772006	0.8196885962
17.1790838716	0.8190477150
17.2782598051	0.8184100964
17.3780082875	0.8177757233
17.4783326242	0.8171445789
17.5792361396	0.8165166462
17.6807221773	0.8158919087
17.7827941004	0.8152703498
17.8854552911	0.8146519528
17.9887091513	0.8140367013
18.0925591025	0.8134245790
18.1970085861	0.8128155697
18.3020610631	0.8122096571
18.4077200147	0.8116068252
18.5139889421	0.8110070580
18.6208713666	0.8104103396
18.7283708302	0.8098166541
18.8364908949	0.8092259859
18.9452351436	0.8086383192
19.0546071796	0.8080536386
19.1646106274	0.8074719285
19.2752491319	0.8068931735
19.3865263595	0.8063173583
19.4984459976	0.8057444678
19.6110117548	0.8051744866
19.7242273611	0.8046073999
19.8380965684	0.8040431926
19.9526231497	0.8034818497
20.0678109002	0.8029233566
20.1836636368	0.8023676983
20.3001851986	0.8018148604
20.4173794467	0.8012648281
20.5352502646	0.8007175871
20.6538015581	0.8001731228
20.7730372557	0.7996314209
20.8929613085	0.7990924672
21.0135776905	0.7985562474
21.1348903984	0.7980227475
21.2569034522	0.7974919534
21.3796208950	0.7969638511
21.5030467934	0.7964384268
21.6271852373	0.7959156666
21.7520403402	0.7953955568
21.8776162395	0.7948780837
22.0039170964	0.7943632338
22.1309470961	0.7938509935
22.2587104479	0.7933413494
22.3872113857	0.7928342881
22.5164541674	0.7923297962
22.6464430759	0.7918278607
22.7771824186	0.7913284682
22.9086765277	0.7908316058
23.0409297606	0.7903372604
23.1739464997	0.7898454190
23.3077311528	0.7893560688
23.4422881532	0.7888691969
23.5776219596	0.7883847907
23.7137370566	0.7879028374
23.8506379547	0.7874233245
23.9883291902	0.7869462393
24.1268153259	0.7864715695
24.2661009508	0.7859993025
24.4061906804	0.7855294262
24.5470891569	0.7850619282
24.6888010491	0.7845967962
24.8313310530	0.7841340183
24.9746838915	0.7836735822
25.1188643151	0.7832154759
25.2638771013	0.7827596876
25.4097270555	0.7823062053
25.5564190106	0.7818550172
25.7039578277	0.7814061116
25.8523483956	0.7809594767
26.0015956317	0.7805151009
26.1517044814	0.7800729726
26.3026799190	0.7796330804
26.4545269472	0.7791954128
26.6072505980	0.7787599583
26.7608559320	0.7783267057
26.9153480393	0.7778956437
27.0707320392	0.7774667611
27.2270130808	0.7770400467
27.3841963426	0.7766154894
27.5422870334	0.7761930782
27.7012903916	0.7757728022
27.8612116863	0.7753546504
28.0220562167	0.7749386119
28.1838293126	0.7745246760
28.3465363349	0.7741128320
28.5101826750	0.7737030690
28.6747737558	0.7732953765
28.8403150313	0.7728897440
29.0068119869	0.7724861609
29.1742701400	0.7720846167
29.3426950396	0.7716851010
29.5120922667	0.7712876036
29.6824674346	0.7708921140
29.8538261892	0.7704986220
30.0261742086	0.7701071175
30.1995172040	0.7697175903
30.3738609195	0.7693300304
30.5492111322	0.7689444276
30.7255736527	0.7685607721
30.9029543251	0.7681790539
31.0813590274	0.7677992631
31.2607936712	0.7674213899
31.4412642026	0.7670454245
31.6227766017	0.7666713573
31.8053368833	0.7662991785
31.9889510969	0.7659288786
32.1736253270	0.7655604479
32.3593656930	0.7651938770
32.5461783498	0.7648291564
32.7340694879	0.7644662766
32.9230453333	0.7641052284
33.1131121483	0.7637460024
33.3042762309	0.7633885893
33.4965439158	0.7630329799
33.6899215741	0.7626791650
33.8844156139	0.7623271356
34.0800324800	0.7619768825
34.2767786546	0.7616283967
34.4746606573	0.7612816692
34.6736850453	0.7609366911
34.8738584135	0.7605934535
35.0751873953	0.7602519476
35.2776786619	0.7599121645
35.4813389234	0.7595740956
35.6861749283	0.7592377321
35.8921934645	0.7589030653
36.0994013586	0.7585700867
36.3078054770	0.7582387876
36.5174127255	0.7579091596
36.7282300498	0.7575811942
36.9402644358	0.7572548829
37.1535229097	0.7569302174
37.3680125382	0.7566071892
37.5837404288	0.7562857902
37.8007137302	0.7559660120
38.0189396321	0.7556478464
38.2384253658	0.7553312852
38.4591782045	0.7550163204
38.6812054633	0.7547029437
38.9045144994	0.7543911473
39.1291127127	0.7540809230
39.3550075456	0.7537722628
39.5822064836	0.7534651590
39.8107170553	0.7531596036
40.0405468331	0.7528555887
40.2717034325	0.7525531065
40.5041945136	0.7522521494
40.7380277804	0.7519527095
40.9732109814	0.7516547792
41.2097519097	0.7513583508
41.4476584038	0.7510634168
41.6869383470	0.7507699696
41.9275996685	0.7504780016
42.1696503429	0.7501875054
42.4130983910	0.7498984735
42.6579518802	0.7496108986
42.9042189239	0.7493247732
43.1519076828	0.7490400900
43.4010263645	0.7487568418
43.6515832240	0.7484750212
43.9035865641	0.7481946211
44.1570447353	0.7479156343
44.4119661366	0.7476380536
44.6683592151	0.7473618720
44.9262324670	0.7470870823
45.1855944375	0.7468136775
45.4464537210	0.7465416506
45.7088189615	0.7462709948
45.9726988531	0.7460017030
46.2381021399	0.7457337683
46.5050376167	0.7454671839
46.7735141287	0.7452019430
47.0435405726	0.7449380388
47.3151258961	0.7446754646
47.5882790989	0.7444142136
47.8630092323	0.7441542791
48.1393254000	0.7438956546
48.4172367584	0.7436383334
48.6967525166	0.7433823088
48.9778819368	0.7431275745
49.2606343350	0.7428741238
49.5450190805	0.7426219504
49.8310455971	0.7423710477
50.1187233627	0.7421214093
50.4080619103	0.7418730289
50.6990708275	0.7416259001
50.9917597575	0.7413800166
51.2861383991	0.7411353721
51.5822165072	0.7408919605
51.8800038929	0.7406497753
52.1795104239	0.7404088106
52.4807460250	0.7401690601
52.7837206782	0.7399305177
53.0884444231	0.7396931774
53.3949273574	0.7394570330
53.7031796370	0.7392220785
54.0132114765	0.7389883080
54.3250331492	0.7387557155
54.6386549882	0.7385242950
54.9540873858	0.7382940406
55.2713407944	0.7380649465
55.5904257270	0.7378370069
55.9113527571	0.7376102158
56.2341325190	0.7373845675
56.5587757089	0.7371600564
56.8852930844	0.7369366765
57.2136954652	0.7367144223
57.5439937337	0.7364932881
57.8761988349	0.7362732682
58.2103217771	0.7360543571
58.5463736321	0.7358365491
58.8843655356	0.7356198386
59.2243086876	0.7354042203
59.5662143529	0.7351896885
59.9100938611	0.7349762379
60.2559586074	0.7347638629
60.6038200527	0.7345525581
60.9536897240	0.7343423183
61.3055792150	0.7341331379
61.6595001861	0.7339250117
62.0154643654	0.7337179344
62.3734835482	0.7335119007
62.7335695984	0.7333069054
63.0957344480	0.7331029431
63.4599900981	0.7329000088
63.8263486191	0.7326980973
64.1948221508	0.7324972034
64.5654229035	0.7322973220
64.9381631576	0.7320984480
65.3130552647	0.7319005764
65.6901116476	0.7317037021
66.0693448008	0.7315078200
66.4507672908	0.7313129253
66.8343917569	0.7311190129
67.2202309112	0.7309260779
67.6082975392	0.7307341154
67.9986045003	0.7305431205
68.3911647281	0.7303530884
68.7859912309	0.7301640141
69.1830970919	0.7299758930
69.5824954701	0.7297887201
69.9841996002	0.7296024908
70.3882227936	0.7294172002
70.7945784384	0.7292328438
71.2032799999	0.7290494167
71.6143410213	0.7288669143
72.0277751238	0.7286853320
72.4435960075	0.7285046652
72.8618174513	0.7283249091
73.2824533139	0.7281460594
73.7055175338	0.7279681114
74.1310241301	0.7277910606
74.5589872028	0.7276149024
74.9894209332	0.7274396325
75.4223395848	0.7272652462
75.8577575029	0.7270917393
76.2956891162	0.7269191073
76.7361489362	0.7267473458
77.1791515585	0.7265764504
77.6247116629	0.7264064167
78.0728440138	0.7262372405
78.5235634610	0.7260689175
78.9768849400	0.7259014432
79.4328234724	0.7257348136
79.8913941667	0.7255690244
80.3526122186	0.7254040712
80.8164929113	0.7252399500
81.2830516164	0.7250766566
81.7523037944	0.7249141868
82.2242649947	0.7247525364
82.6989508568	0.7245917014
83.1763771103	0.7244316777
83.6565595756	0.7242724612
84.1395141645	0.7241140478
84.6252568807	0.7239564335
85.1138038202	0.7237996143
85.6051711720	0.7236435862
86.0993752185	0.7234883452
86.5964323360	0.7233338875
87.0963589956	0.7231802090
87.5991717633	0.7230273058
88.1048873008	0.7228751741
88.6135223659	0.7227238100
89.1250938134	0.7225732096
89.6396185950	0.7224233691
90.1571137606	0.7222742847
90.6775964584	0.7221259526
91.2010839356	0.7219783690
91.7275935390	0.7218315302
92.2571427155	0.7216854324
92.7897490127	0.7215400719
93.3254300797	0.7213954450
93.8642036672	0.7212515481
94.4060876286	0.7211083774
94.9510999202	0.7209659293
95.4992586021	0.7208242003
96.0505818387	0.7206831866
96.6050878990	0.7205428847
97.1627951577	0.7204032911
97.7237220956	0.7202644021
98.2878873000	0.7201262142
98.8553094657	0.7199887240
99.4260073953	0.7198519280
100.0000000000	0.7197158225
100.5773063002	0.7195804043
101.1579454260	0.7194456697
101.7419366181	0.7193116155
102.3292992281	0.7191782382
102.9200527194	0.7190455343
103.5142166679	0.7189135006
104.1118107623	0.7187821336
104.7128548051	0.7186514301
105.3173687130	0.7185213866
105.9253725177	0.7183919999
106.5368863668	0.7182632666
107.1519305238	0.7181351836
107.7705253694	0.7180077475
108.3926914021	0.7178809551
109.0184492385	0.7177548031
109.6478196143	0.7176292884
110.2808233850	0.7175044078
110.9174815262	0.7173801580
111.5578151351	0.7172565359
112.2018454302	0.7171335384
112.8495937528	0.7170111624
113.5010815672	0.7168894046
114.1563304619	0.7167682621
114.8153621497	0.7166477316
115.4781984689	0.7165278103
116.1448613840	0.7164084949
116.8153729861	0.7162897825
117.4897554940	0.7161716700
118.1680312545	0.7160541545
118.8502227437	0.7159372329
119.5363525674	0.7158209022
120.2264434617	0.7157051595
120.9205182943	0.7155900019
121.6186000646	0.7154754264
122.3207119050	0.7153614300
123.0268770812	0.7152480100
123.7371189935	0.7151351633
124.4514611771	0.7150228871
125.1699273032	0.7149111786
125.8925411794	0.7148000349
126.6193267511	0.7146894532
127.3503081017	0.7145794306
128.0855094536	0.7144699644
128.8249551693	0.7143610517
129.5686697517	0.7142526898
130.3166778452	0.7141448759
131.0690042366	0.7140376073
131.8256738556	0.7139308813
132.5867117761	0.7138246950
133.3521432163	0.7137190458
134.1219935405	0.7136139311
134.8962882592	0.7135093481
135.6750530300	0.7134052941
136.4583136589	0.7133017665
137.2460961008	0.7131987628
138.0384264603	0.7130962801
138.8353309929	0.7129943160
139.6368361056	0.7128928678
140.4429683578	0.7127919329
141.2537544623	0.7126915088
142.0692212860	0.7125915929
142.8893958511	0.7124921826
143.7143053356	0.7123932754
144.5439770746	0.7122948689
145.3784385608	0.7121969603
146.2177174457	0.7120995474
147.0618415405	0.7120026276
147.9108388168	0.7119061983
148.7647374080	0.7118102573
149.6235656094	0.7117148019
150.4873518803	0.7116198298
151.3561248436	0.7115253385
152.2299132880	0.7114313257
153.1087461682	0.7113377888
153.9926526059	0.7112447256
154.8816618912	0.7111521337
155.7758034832	0.7110600107
156.6751070108	0.7109683542
157.5796022744	0.7108771619
158.4893192461	0.7107864315
159.4042880712	0.7106961606
160.3245390690	0.7106063470
161.2501027338	0.7105169883
162.1810097359	0.7104280823
163.1172909228	0.7103396267
164.0589773200	0.7102516193
165.0061001320	0.7101640577
165.9586907438	0.7100769397
166.9167807211	0.7099902632
167.8804018123	0.7099040259
168.8495859487	0.7098182256
169.8243652462	0.7097328601
170.8047720060	0.7096479272
171.7908387158	0.7095634248
172.7825980508	0.7094793506
173.7800828749	0.7093957026
174.7833262418	0.7093124786
175.7923613959	0.7092296764
176.8072217734	0.7091472941
177.8279410039	0.7090653293
178.8545529108	0.7089837801
179.8870915129	0.7089026444
180.9255910254	0.7088219200
181.9700858610	0.7087416050
183.0206106311	0.7086616972
184.0772001469	0.7085821947
185.1398894205	0.7085030953
186.2087136663	0.7084243971
187.2837083018	0.7083460980
188.3649089490	0.7082681961
189.4523514357	0.7081906893
190.5460717963	0.7081135757
191.6461062735	0.7080368532
192.7524913191	0.7079605200
193.8652635952	0.7078845740
194.9844599758	0.7078090134
196.1101175476	0.7077338361
197.2422736115	0.7076590403
198.3809656837	0.7075846240
199.5262314969	0.7075105854
200.6781090018	0.7074369225
201.8366363682	0.7073636335
203.0018519860	0.7072907164
204.1737944670	0.7072181694
205.3525026457	0.7071459906
206.5380155811	0.7070741783
207.7303725573	0.7070027305
208.9296130854	0.7069316454
210.1357769047	0.7068609212
211.3489039837	0.7067905561
212.5690345217	0.7067205482
213.7962089502	0.7066508959
215.0304679340	0.7065815972
216.2718523727	0.7065126504
217.5204034020	0.7064440538
218.7761623950	0.7063758056
220.0391709637	0.7063079040
221.3094709606	0.7062403473
222.5871044793	0.7061731338
223.8721138568	0.7061062617
225.1645416745	0.7060397293
226.4644307593	0.7059735349
227.7718241857	0.7059076768
229.0867652768	0.7058421533
230.4092976056	0.7057769628
231.7394649968	0.7057121035
233.0773115283	0.7056475739
234.4228815320	0.7055833721
235.7762195961	0.7055194967
237.1373705662	0.7054559459
238.5063795465	0.7053927181
239.8832919019	0.7053298117
241.2681532592	0.7052672250
242.6610095082	0.7052049566
244.0619068042	0.7051430046
245.4708915685	0.7050813677
246.8880104906	0.7050200441
248.3133105296	0.7049590324
249.7468389154	0.7048983309
251.1886431510	0.7048379381
252.6387710132	0.7047778524
254.0972705549	0.7047180722
255.5641901064	0.7046585961
257.0395782769	0.7045994226
258.5234839562	0.7045405500
260.0159563165	0.7044819769
261.5170448138	0.7044237017
263.0267991895	0.7043657231
264.5452694724	0.7043080394
266.0725059799	0.7042506492
267.6085593199	0.7041935510
269.1534803927	0.7041367433
270.7073203921	0.7040802248
272.2701308078	0.7040239938
273.8419634264	0.7039680491
275.4228703338	0.7039123890
277.0129039164	0.7038570123
278.6121168630	0.7038019174
280.2205621667	0.7037471030
281.8382931264	0.7036925677
283.4653633490	0.7036383100
285.1018267504	0.7035843285
286.7477375581	0.7035306219
288.4031503127	0.7034771887
290.0681198693	0.7034240276
291.7427014001	0.7033711373
293.4269503956	0.7033185163
295.1209226666	0.7032661633
296.8246743463	0.7032140769
298.5382618918	0.7031622558
300.2617420861	0.7031106987
301.9951720402	0.7030594043
303.7386091946	0.7030083711
305.4921113216	0.7029575980
307.2557365267	0.7029070835
309.0295432514	0.7028568264
310.8135902739	0.7028068254
312.6079367124	0.7027570792
314.4126420259	0.7027075865
316.2277660168	0.7026583460
318.0533688330	0.7026093565
319.8895109691	0.7025606167
321.7362532696	0.7025121253
323.5936569296	0.7024638811
325.4617834980	0.7024158829
327.3406948788	0.7023681293
329.2304533334	0.7023206192
331.1311214826	0.7022733513
333.0427623087	0.7022263245
334.9654391578	0.7021795374
336.8992157415	0.7021329890
338.8441561392	0.7020866779
340.8003248004	0.7020406030
342.7677865465	0.7019947631
344.7466065731	0.7019491570
346.7368504525	0.7019037836
348.7385841352	0.7018586416
350.7518739526	0.7018137299
352.7767866189	0.7017690473
354.8133892336	0.7017245927
356.8617492835	0.7016803650
358.9219346450	0.7016363629
360.9940135864	0.7015925853
363.0780547701	0.7015490312
365.1741272548	0.7015056993
367.2823004981	0.7014625886
369.4026443583	0.7014196979
371.5352290972	0.7013770262
373.6801253821	0.7013345722
375.8374042884	0.7012923350
378.0071373018	0.7012503135
380.1893963206	0.7012085065
382.3842536581	0.7011669129
384.5917820454	0.7011255317
386.8120546331	0.7010843618
389.0451449943	0.7010434022
391.2911271269	0.7010026518
393.5500754558	0.7009621094
395.8220648357	0.7009217742
398.1071705535	0.7008816449
400.4054683305	0.7008417207
402.7170343255	0.7008020004
405.0419451365	0.7007624830
407.3802778041	0.7007231676
409.7321098135	0.7006840530
412.0975190973	0.7006451382
414.4765840379	0.7006064223
416.8693834703	0.7005679043
419.2759966846	0.7005295831
421.6965034286	0.7004914577
424.1309839105	0.7004535272
426.5795188016	0.7004157906
429.0421892389	0.7003782469
431.5190768278	0.7003408951
434.0102636447	0.7003037342
436.5158322402	0.7002667634
439.0358656409	0.7002299815
441.5704473533	0.7001933878
444.1196613656	0.7001569811
446.6835921510	0.7001207607
449.2623246703	0.7000847254
451.8559443749	0.7000488745
454.4645372095	0.7000132069
457.0881896149	0.6999777217
459.7269885309	0.6999424181
462.3810213993	0.6999072951
465.0503761666	0.6998723517
467.7351412872	0.6998375871
470.4354057260	0.6998030004
473.1512589615	0.6997685906
475.8827909888	0.6997343569
478.6300923226	0.6997002984
481.3932540001	0.6996664142
484.1723675841	0.6996327034
486.9675251659	0.6995991652
489.7788193684	0.6995657986
492.6063433496	0.6995326028
495.4501908048	0.6994995769
498.3104559705	0.6994667201
501.1872336273	0.6994340315
504.0806191027	0.6994015103
506.9907082747	0.6993691556
509.9175975749	0.6993369665
512.8613839914	0.6993049423
515.8221650723	0.6992730821
518.8000389290	0.6992413851
521.7951042390	0.6992098504
524.8074602498	0.6991784772
527.8372067816	0.6991472647
530.8844442310	0.6991162121
533.9492735742	0.6990853186
537.0317963703	0.6990545833
540.1321147646	0.6990240056
543.2503314924	0.6989935845
546.3865498819	0.6989633192
549.5408738576	0.6989332091
552.7134079444	0.6989032533
555.9042572704	0.6988734510
559.1135275706	0.6988438014
562.3413251903	0.6988143038
565.5877570892	0.6987849574
568.8529308438	0.6987557614
572.1369546523	0.6987267151
575.4399373372	0.6986978177
578.7619883491	0.6986690685
582.1032177709	0.6986404666
585.4637363206	0.6986120115
588.8436553556	0.6985837022
592.2430868761	0.6985555381
595.6621435290	0.6985275185
599.1009386114	0.6984996426
602.5595860744	0.6984719096
606.0382005271	0.6984443189
609.5368972402	0.6984168697
613.0557921498	0.6983895613
616.5950018615	0.6983623931
620.1546436538	0.6983353642
623.7348354824	0.6983084740
627.3356959840	0.6982817218
630.9573444802	0.6982551068
634.5999009813	0.6982286285
638.2634861905	0.6982022860
641.9482215080	0.6981760787
645.6542290347	0.6981500059
649.3816315762	0.6981240670
653.1305526475	0.6980982612
656.9011164763	0.6980725879
660.6934480076	0.6980470464
664.5076729078	0.6980216360
668.3439175686	0.6979963561
672.2023091116	0.6979712060
676.0829753920	0.6979461850
679.9860450033	0.6979212925
683.9116472814	0.6978965279
687.8599123088	0.6978718905
691.8309709189	0.6978473795
695.8249547006	0.6978229945
699.8419960023	0.6977987348
703.8822279365	0.6977745997
707.9457843841	0.6977505885
712.0327999992	0.6977267007
716.1434102129	0.6977029357
720.2777512383	0.6976792928
724.4359600750	0.6976557713
728.6181745132	0.6976323708
732.8245331389	0.6976090905
737.0551753379	0.6975859298
741.3102413009	0.6975628882
745.5898720278	0.6975399650
749.8942093325	0.6975171596
754.2233958476	0.6974944715
758.5775750292	0.6974719000
762.9568911615	0.6974494446
767.3614893618	0.6974271046
771.7915155850	0.6974048795
776.2471166287	0.6973827686
780.7284401379	0.6973607715
785.2356346101	0.6973388875
789.7688493999	0.6973171160
794.3282347243	0.6972954565
798.9139416674	0.6972739084
803.5261221856	0.6972524712
808.1649291125	0.6972311442
812.8305161641	0.6972099270
817.5230379436	0.6971888189
822.2426499471	0.6971678194
826.9895085679	0.6971469280
831.7637711027	0.6971261440
836.5655957558	0.6971054670
841.3951416452	0.6970848965
846.2525688073	0.6970644317
851.1380382024	0.6970440723
856.0517117201	0.6970238178
860.9937521846	0.6970036674
865.9643233601	0.6969836208
870.9635899561	0.6969636774
875.9917176331	0.6969438367
881.0488730080	0.6969240981
886.1352236595	0.6969044611
891.2509381337	0.6968849253
896.3961859499	0.6968654900
901.5711376060	0.6968461549
906.7759645839	0.6968269193
912.0108393559	0.6968077828
917.2759353898	0.6967887449
922.5714271548	0.6967698050
927.8974901273	0.6967509627
933.2543007970	0.6967322174
938.6420366721	0.6967135687
944.0608762859	0.6966950161
949.5109992022	0.6966765591
954.9925860214	0.6966581972
960.5058183867	0.6966399299
966.0508789898	0.6966217568
971.6279515771	0.6966036773
977.2372209558	0.6965856910
982.8788730000	0.6965677973
988.5530946569	0.6965499960
994.2600739530	0.6965322863
[truncated: 1 more rows]
